# Supplementary material for: Mapping the sex determination locus in the Atlantic halibut (Hippoglossus hippoglossus) using RAD sequencing
Source: PubMed Central journal article supplement (PMC3765698; doi:10.1186/1471-2164-14-566), 2013-08-20

*Latimeria chalumnae*

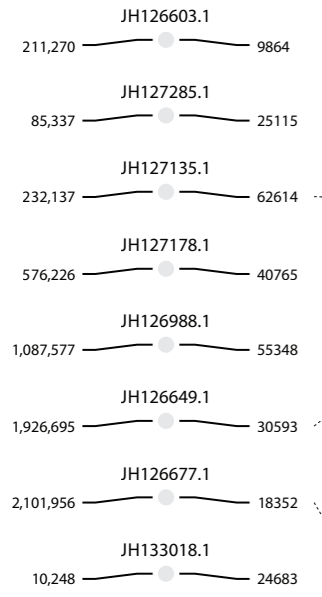

*Gadus morhua*

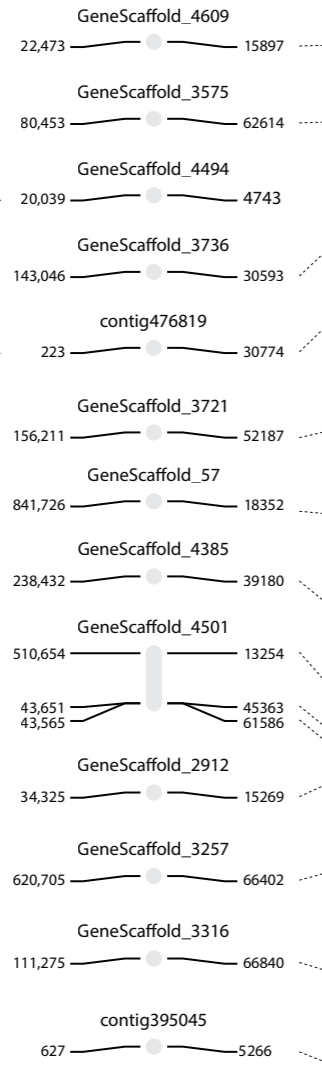

*Takifugu rubripes*

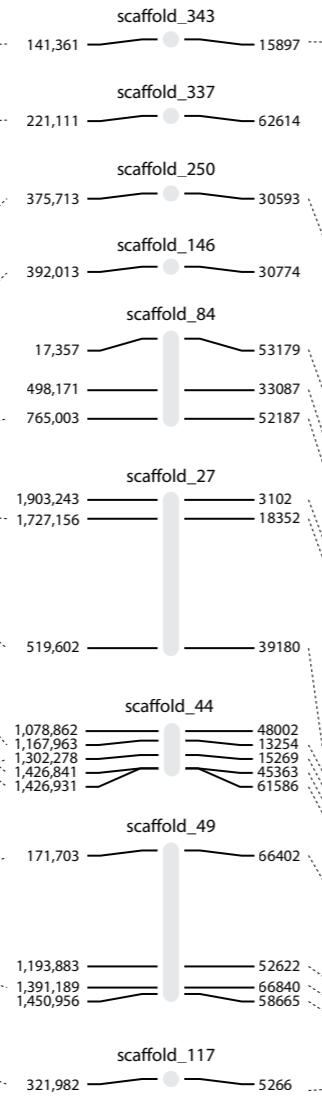

*Gasterosteus aculeatus*

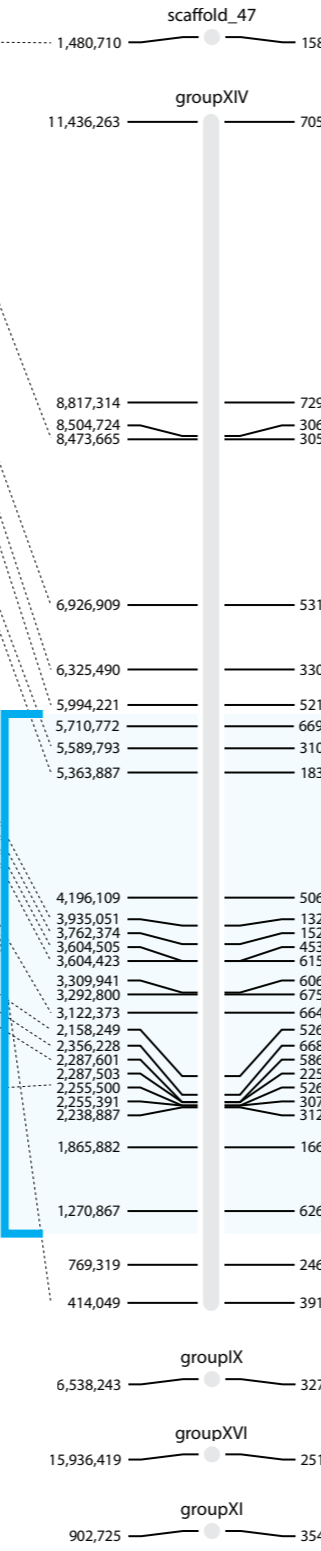

*Oreochromis niloticus*

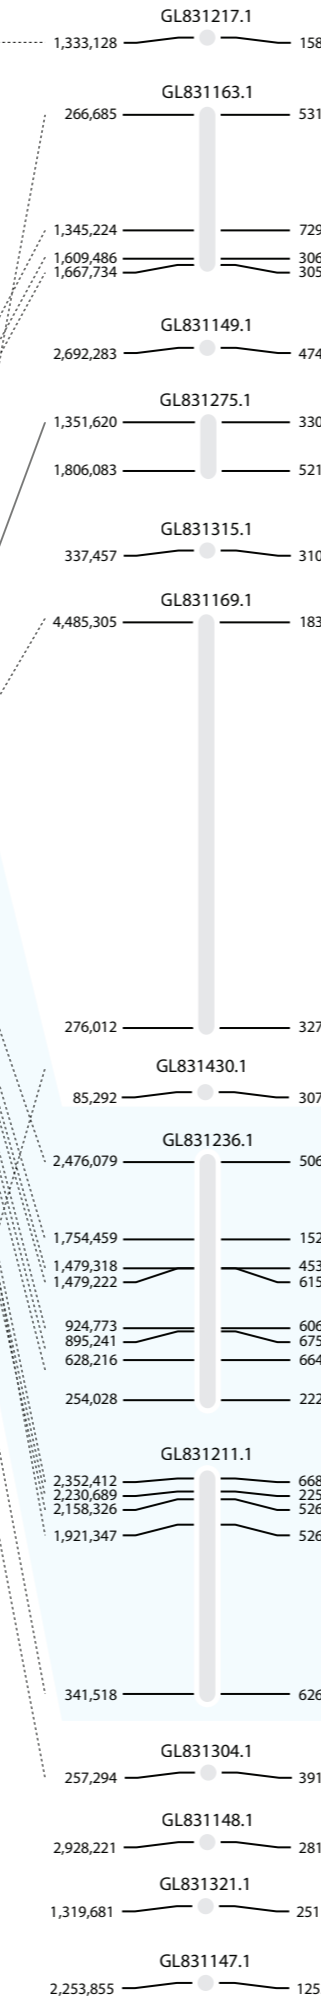

*Oryzias latipes*

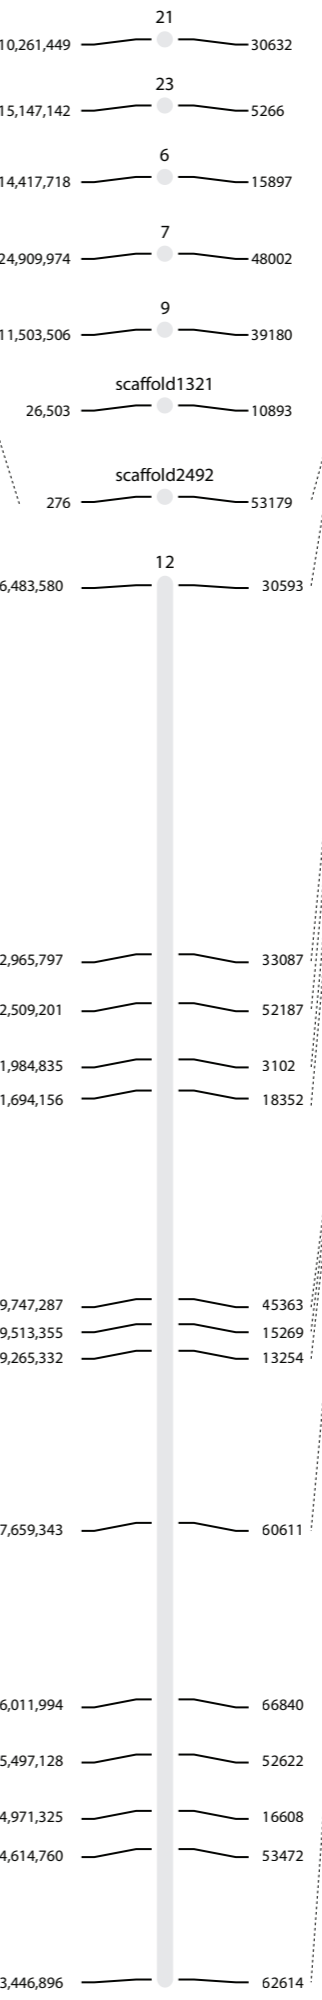

*Tetraodon nigroviridis*

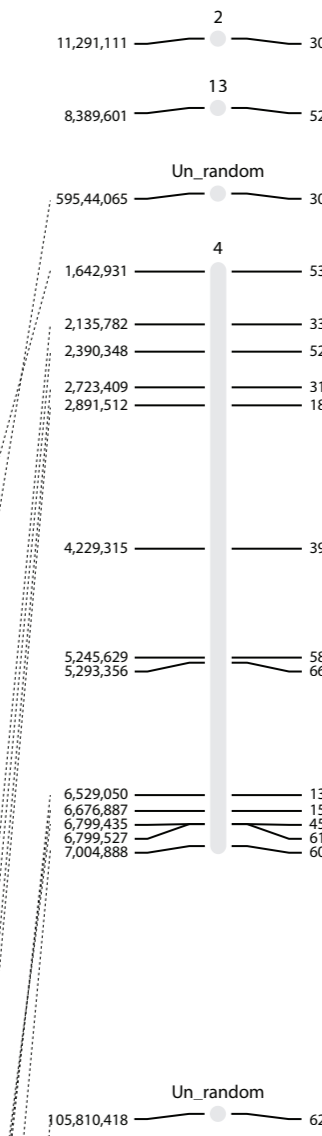

*Danio rerio*

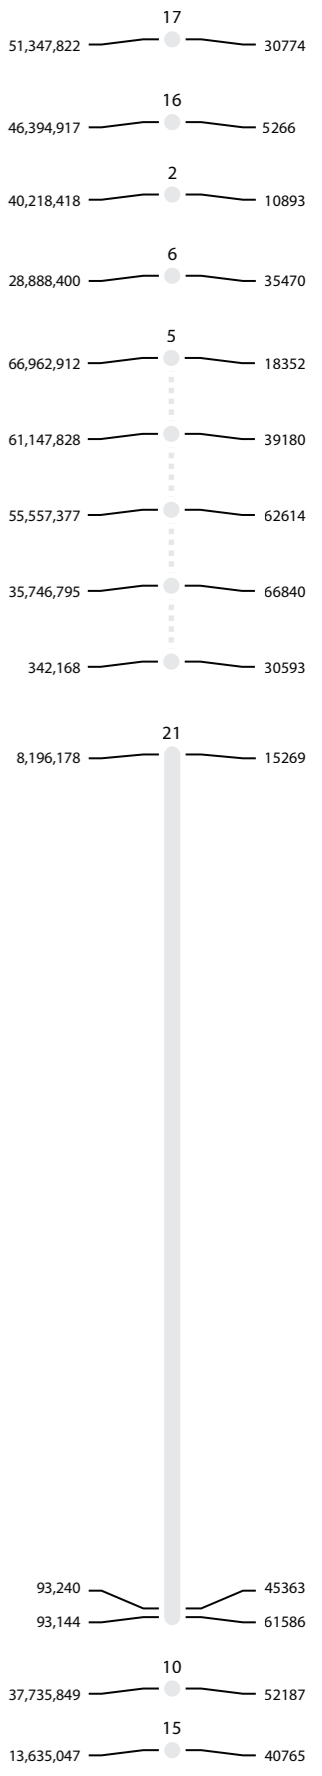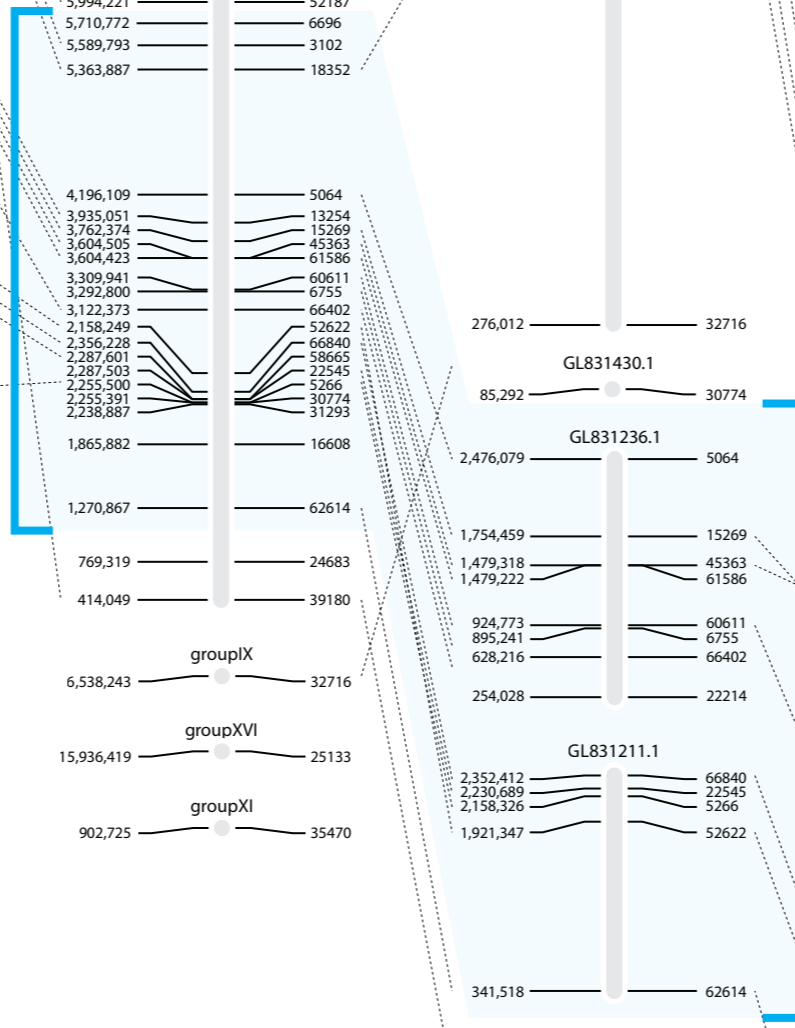

Supplement: 1471-2164-14-566-S5.pdf [file 1471-2164-14-566-S5.pdf]
